# Supplementary material for: Effect of connectivity variation in azulene-BODIPY triads and their optoelectronic properties
Source: Royal Society of Chemistry journal article supplement (doi:10.1039/d2nj05995a), 2022-12-28
Supplement: d2nj05995a1.pdf [file d2nj05995a1.pdf]

## **Effect of connectivity variation in Azulene-BODIPY triads and their optoelectronic properties**

Neha Rani Kumar<sup>a\*</sup>, Abhijeet R. Agrawal<sup>a</sup>, Sashi Debnath<sup>b</sup>, Aditya Choudhury<sup>a</sup> and Sanjio S.  
Zade<sup>a\*</sup>

<sup>a</sup>*Department of Chemical Sciences, Indian Institute of Science Education and Research (IISER)  
Kolkata, Mohanpur 741246, India.*

<sup>b</sup>UT Southwestern Medical Center, Dallas, TX 75390, United States

[\*] email: [nehakumar0926@gmail.com](mailto:nehakumar0926@gmail.com), [sanjiozade@iiserkol.ac.in](mailto:sanjiozade@iiserkol.ac.in)

## Table of Contents

| Serial No. | Title                                                                              | Page No. |
|------------|------------------------------------------------------------------------------------|----------|
| <b>1</b>   | Experimental Section                                                               |          |
|            | A Materials                                                                        | S3       |
|            | B General instrumentation                                                          | S3       |
|            | C Synthesis of precursors and azulene-BODIPY triads                                | S4       |
|            | D General procedure for Sonogashira coupling reaction                              | S4       |
| <b>2</b>   | Purification and Characterization                                                  | S5-S7    |
| <b>3</b>   | <sup>1</sup> H NMR spectrum of compound <b>A</b> (1AzBDP1Az) ( <b>Figure S1</b> )  | S8       |
| <b>4</b>   | <sup>13</sup> C NMR spectrum of compound <b>A</b> (1AzBDP1Az) ( <b>Figure S2</b> ) | S8       |
| <b>5</b>   | IR spectrum of compound <b>A</b> (1AzBDP1Az) ( <b>Figure S3</b> )                  | S9       |
| <b>6</b>   | <sup>1</sup> H NMR spectrum of compound <b>B</b> (2AzBDP2Az) ( <b>Figure S4</b> )  | S9       |
| <b>7</b>   | <sup>13</sup> C NMR spectrum of compound <b>B</b> (2AzBDP2Az) ( <b>Figure S5</b> ) | S10      |
| <b>8</b>   | IR spectrum of compound <b>B</b> (2AzBDP2Az) ( <b>Figure S6</b> )                  | S10      |
| <b>9</b>   | <sup>1</sup> H NMR spectrum of compound <b>C</b> (6AzBDP6Az) ( <b>Figure S7</b> )  | S11      |
| <b>10</b>  | <sup>13</sup> C NMR spectrum of compound <b>C</b> (6AzBDP6Az) ( <b>Figure S8</b> ) | S11      |
| <b>11</b>  | IR spectrum of compound <b>C</b> (6AzBDP6Az) ( <b>Figure S9</b> )                  | S12      |
| <b>12</b>  | <sup>1</sup> H NMR spectrum of compound <b>D</b> (BDPAzBDP) ( <b>Figure S10</b> )  | S12      |
| <b>13</b>  | <sup>13</sup> C NMR spectrum of compound <b>D</b> (BDPAzBDP) ( <b>Figure S11</b> ) | S13      |
| <b>14</b>  | IR spectrum of compound <b>D</b> (BDPAzBDP) ( <b>Figure S12</b> )                  | S13      |
| <b>15</b>  | TD-DFT graph of Azulene-BODIPY triads ( <b>A-D</b> ) ( <b>Table S1</b> )           | S14      |
| <b>16</b>  | References                                                                         | S15      |
| <b>17</b>  | Coordinates for optimized geometries ( <b>A, B, C, D</b> )                         | S15-S23  |

## Experimental section

### Materials

All reagents were obtained from commercial sources (Sigma Aldrich, Spectrochem, Merck and Alfa Aesar) and used as received without further purification unless otherwise specified. Toluene was dried over sodium/benzophenone before use. Triethylamine was distilled using potassium hydroxide flakes. Dry reactions were conducted in oven-dried glassware using a standard Schlenk line under an inert atmosphere of dry nitrogen.

### General instrumentation

$^1\text{H}$  and  $^{13}\text{C}$  NMR spectra of the monomers and precursors were recorded at room temperature on a Jeol JNM-ECS 400 spectrometer (400 MHz  $^1\text{H}$ , 100 MHz  $^{13}\text{C}$ ) or Bruker Avance 500 (500 MHz  $^1\text{H}$ , 125 MHz  $^{13}\text{C}$ ) spectrometer with tetramethylsilane as the internal reference; chemical shifts ( $\delta$ ) are given in parts per million (ppm). Spectra were processed using MestReNova v5 and referenced to residual protonated solvent signals ( $\text{CDCl}_3$ :  $^1\text{H}$  7.26 ppm,  $^{13}\text{C}$  77.16 ppm). Thermogravimetric analysis (TGA) was performed under nitrogen on a Mettler Toledo TGA/SDTA 851 thermogravimetric analyzer at a heating rate of  $10\text{ }^\circ\text{C min}^{-1}$ . UV-vis-absorption spectra were recorded on an Agilent Cary-60 UV-vis spectrophotometer. Solid-state UV-vis spectra were recorded by drop-casting the compounds from dichloromethane solution on ITO glass plates and then drying the films under vacuum. Cyclic voltammetry was performed on a computer-controlled Princeton Applied Research 263A electrochemical workstation using a three-electrode arrangement. A Pt wire was used as the counter electrode, a platinum electrode as the working electrode and Ag/AgCl was used as the reference electrode. Ferrocene was used as an internal standard. TBAPF<sub>6</sub> (0.1 M) dissolved in dry DCM was used as the supporting electrolyte. The half-wave potential of the ferrocene/ferrocenium couple was calculated to be 0.36 V. All electrochemical experiments were performed under a nitrogen atmosphere. DFT calculation was performed using Gaussian 09 program<sup>1</sup> with B3LYP functional and the 6-31G(d) basis set. Fourier transform infrared spectroscopy (FTIR) spectra were recorded in the range of  $4000\text{--}400\text{ cm}^{-1}$  using the KBR pellet technique on a Perkin-Elmer RX1 IR Spectrometer.

## Synthesis of precursors and azulene-BODIPY triads

2-bromoazulene (**2**), 6-bromoazulene (**3**), 1-iodoazulene (**1**) and 1,3-diiodoazulene (**4**) was synthesized starting from tropolone by following the procedures reported in literature.<sup>2</sup> Ethynyl-BODIPY derivatives **7** and **8** were synthesized from 4-hydroxy benzaldehyde by following the literature method.<sup>3</sup>

### General procedure for Sonogashira coupling of bromo azulenes with ethynyl substituted BODIPY.

An oven-dried three-neck round-bottomed flask fitted with a reflux condenser is flushed with N<sub>2</sub> gas for few minutes, and then it is charged with bromoazulene (1 equivalent), Pd(PPh<sub>3</sub>)<sub>2</sub>Cl<sub>2</sub> (5 mol%) and CuI (10 mol%). A separate single neck round-bottomed flask fitted with a rubber septum is charged with 5 mL dry toluene and 5 mL dry triethylamine. This mixture is purged with N<sub>2</sub> for 10 minutes and then transferred to the three-necked round-bottomed flask using a metal syringe. The three-necked round-bottomed flask is further flushed with N<sub>2</sub> for 10 minutes. In a single-neck round-bottomed flask is taken ethynyl substituted BODIPY (0.5 equivalents, with respect to bromoazulene) and this is followed by addition of 5 mL of toluene to it. This round-bottomed flask is flushed with N<sub>2</sub>, and then the solvent mixture is transferred to the three-necked round-bottomed flask, and the temperature of the oil bath is raised to 65 °C. After addition of acetylene compound, an immediate change of colour is observed in the reaction mixture. The progress of the reaction was monitored by thin-layer chromatography. The reaction was completed in less than 1 hour, and prolonged heating led to decomposition of the products formed. After the completion of the reaction, the mixture was allowed to cool to room temperature, and then the contents were transferred to single-necked round-bottomed flask, and the solvents evaporated using rotavapor. Further purification of the compound was done by column chromatography using dichloromethane/hexane mixture. The solid product obtained after column chromatography was further washed with methanol and then dried under vacuum. All the products were obtained in more than 70% yield.

\*\* For the synthesis of compound **D**, 1 equivalent of 1,3-diiodoazulene (**4**) was used with 2 equivalents of the BODIPY counterpart (**7**).

## Purification procedure and characterization

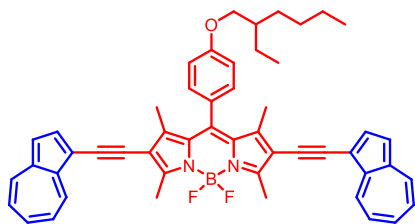

### **A (1AZBDP1AZ)**

Reaction time: 30 minutes; Purification by column chromatography (silica gel, 35% DCM/Hexane) first and then the obtained solid is washed with methanol; Yield: 72%; dark green solid with magenta metallic lustre; Melting point: > 300 °C;  $^1\text{H}$  NMR (400 MHz, Jeol,  $\text{CDCl}_3$ ):  $\delta$  0.84-0.99 (m, 6H); 1.34-1.80 (m, 15H); 2.82 (s, 6H); 3.94 (d, 2H,  $J = 5$  Hz); 7.06-7.26 (m, 10 H); 7.63 (t, 2H,  $J = 10$  Hz); 7.97 (d, 2H,  $J = 5$  Hz); 8.28 (d, 2H,  $J = 10$  Hz); 8.53 (d, 2H,  $J = 10$  Hz);  $^{13}\text{C}$  NMR (100 MHz, Jeol,  $\text{CDCl}_3$ ):  $\delta$ . 11.32, 13.96, 14.01, 14.24, 23.13, 24.05, 29.31, 30.62, 39.58, 71.10, 86.37, 92.94, 111.06, 115.47, 117.14, 117.95, 124.08, 124.77, 126.57, 129.39, 131.96, 136.4, 137.32, 138.80, 139.30, 140.89, 141.61, 142.37, 142.97, 158.12, 160.43. HRMS,  $(\text{M}+\text{Na})^+$ :  $m/z$  calculated for  $(\text{C}_{51}\text{H}_{47}\text{BF}_2\text{N}_2\text{ONa})^+$ : 775.3647, found: 775.3628. IR (KBr pellet)  $\nu$ : 2954, 2922, 2871, 2855, 2187, 1610, 1530, 1472, 1395, 1326, 1308, 1246, 1221, 1212, 1186, 1089, 1007, 835, 767, 736, 710, 585, 529  $\text{cm}^{-1}$ , Analysis calculated for  $\text{C}_{51}\text{H}_{47}\text{BF}_2\text{N}_2\text{O}$ : C, 81.38; H, 6.29; B, 1.44; F, 5.05; N, 3.72; O, 2.13. Found: C, 81.33; H, 6.20; N, 3.68.

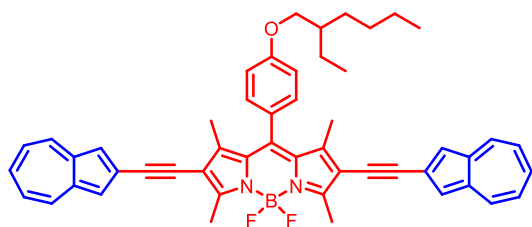

### **B (2AzBDP2Az)**

Reaction time: 45 minutes; Purification by column chromatography (silica gel, 30% DCM/Hexane) first and then the obtained solid is washed with methanol; Yield: 72%; dark magenta solid with metallic lustre; Melting point: > 300 °C;  $^1\text{H}$  NMR (400 MHz, Jeol,  $\text{CDCl}_3$ ):  $\delta$  0.93-1.00 (m, 6H); 1.37-1.39 (m, 4H); 1.45-1.57 (m, 4H); 1.67 (s, 6H); 1.79-1.82 (m, 1H); 2.79 (s, 6H); 3.94 (d, 2H,  $J = 4$  Hz); 7.07 (d, 2H,  $J = 8$  Hz); 7.15-7.18 (m, 6H); 7.41 (s, 4H); 7.53 (t, 2H,  $J = 4$  Hz); 8.22 (d, 4H,  $J = 8$  Hz);  $^{13}\text{C}$  NMR (100 MHz, Jeol,  $\text{CDCl}_3$ ):  $\delta$  11.33, 13.91, 14.26,

23.21, 24.06, 29.32, 29.86, 30.73, 39.59, 71.14, 88.55, 95.33, 115.58, 116.68, 120.39, 124.23, 129.28, 130.76, 136.35, 140.52, 142.98, 144.44, 159.10, 160.53. HRMS (M+H)<sup>+</sup>: m/z calculated for (C<sub>51</sub>H<sub>48</sub>BF<sub>2</sub>N<sub>2</sub>O)<sup>+</sup>: 753.3828, found: 753.3865; IR (KBr pellet)  $\nu^{-1}$ : 2957, 2922, 2871, 2853, 2189, 1609, 1535, 1482, 1395, 1328, 1309, 1260, 1245, 1222, 1209, 1173, 1071, 1009, 890, 802, 764, 724, 705, 587, 570 cm<sup>-1</sup>, Analysis calculated for C<sub>51</sub>H<sub>47</sub>BF<sub>2</sub>N<sub>2</sub>O: C, 81.38; H, 6.29; B, 1.44; F, 5.05; N, 3.72; O, 2.13. Found: C, 81.29; H, 6.24; N, 3.67.

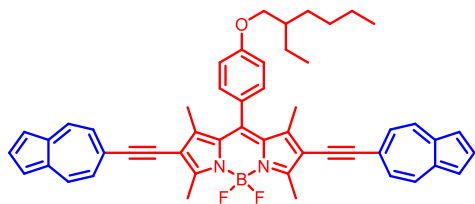

### **C (6AzBDP6Az)**

Reaction time: 45 minutes; Purification by column chromatography (silica gel, 30% DCM/Hexane) first and then the obtained solid is washed with methanol; Yield: 75%; dark magenta solid with metallic lustre; Melting point: > 300 °C; <sup>1</sup>H NMR (400 MHz, Jeol, CDCl<sub>3</sub>):  $\delta$  0.93-1.01 (m, 6H); 1.34-1.39 (m, 4H); 1.46-1.57 (m, 4H); 1.66 (s, 6H); 1.78-1.82 (m, 1H); 2.78 (s, 6H); 3.95 (d, 2H, *J* = 4 Hz), 7.09 (d, 2H, *J* = 8 Hz); 7.19 (d, 2H, *J* = 8 Hz); 7.31-7.37 (m, 8H); 7.85 (t, 2H, *J* = 4 Hz); 8.21 (d, 4H, *J* = 8 Hz). <sup>13</sup>C NMR (100 MHz, Jeol, CDCl<sub>3</sub>):  $\delta$  11.33, 13.94, 14.26, 23.20, 24.05, 29.31, 30.71, 39.58, 71.15, 84.95, 101.85, 115.62, 116.02, 119.24, 125.58, 126.04, 129.20, 132.15, 135.13, 137.51, 143.47, 144.93, 158.95, 160.62. HRMS (M+H)<sup>+</sup>: m/z calculated for (C<sub>51</sub>H<sub>48</sub>BF<sub>2</sub>N<sub>2</sub>O)<sup>+</sup>: 753.3828, found: 753.3811; IR (KBr pellet)  $\nu^{-1}$ : 2995, 2924, 2870, 2857, 2188, 1609, 1528, 1443, 1393, 1318, 1270, 1246, 1219, 1180, 1125, 1067, 1011, 837, 768, 749, 705, 592, 568, 468 cm<sup>-1</sup>, Analysis calculated for C<sub>51</sub>H<sub>47</sub>BF<sub>2</sub>N<sub>2</sub>O: C, 81.38; H, 6.29; B, 1.44; F, 5.05; N, 3.72; O, 2.13. Found: C, 81.35; H, 6.22; N, 3.70.

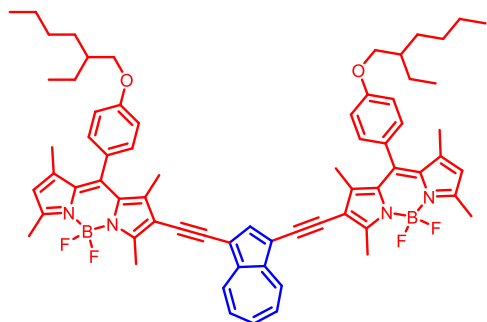

### **D (BDPAzBDP)**

Reaction time: 30 minutes; Purification by column chromatography (silica gel, 80% DCM/Hexane) first and then the obtained solid is washed with methanol; Yield: 85%; dark magenta solid with metallic lustre; Melting point: 272 °C;  $^1\text{H}$  NMR (100 MHz, Jeol,  $\text{CDCl}_3$ ):  $\delta$  0.91-0.98 (m, 12H); 1.31-1.35 (m, 6H); 1.50 (6H, s); 1.52-1.55 (10H, m); 1.64-1.79 (m, 8H); 2.58 (s, 6H); 2.77 (s, 6H); 3.91 (d, 4H,  $J = 4$  Hz); 6.01 (s, 2H); 7.03 (d, 4H,  $J = 8$  Hz); 7.17-7.23 (m, 6H); 7.62 (t, 1H,  $J = 8$  Hz); 8.01 (s, 1H); 8.44 (d, 2H,  $J = 8$  Hz);  $^{13}\text{C}$  NMR (100 MHz, Jeol,  $\text{CDCl}_3$ ):  $\delta$  11.51, 13.59, 13.70, 14.09, 23.03, 23.41, 23.88, 29.15, 29.69, 30.55, 39.42, 70.92, 86.60, 91.09, 111.07, 115.26, 115.84, 121.80, 125.03, 125.33, 126.43, 129.13, 130.89, 132.81, 135.19, 136.83, 139.91, 141.01, 141.36, 142.19, 144.44, 156.41, 156.99, 160.15. HRMS ( $\text{M}+\text{Na}^+$ ):  $m/z$  calculated for  $(\text{C}_{68}\text{H}_{74}\text{B}_2\text{F}_4\text{N}_4\text{O}_2\text{Na})^+$ : 1099.5832, found: 1099.8521, IR (KBr pellet)  $\nu^{-1}$ : 2957, 2923, 2870, 2854, 2193, 1609, 1539, 1515, 1467, 1402, 1360, 1313, 1246, 1222, 1187, 1163, 1074, 1004, 981, 832, 763, 732, 704, 651, 566, 555, 487, 434  $\text{cm}^{-1}$ , Analysis calculated for  $\text{C}_{68}\text{H}_{74}\text{B}_2\text{F}_4\text{N}_4\text{O}_2$ : C, 75.84; H, 6.93; B, 2.01; F, 7.06; N, 5.20; O, 2.97. Found: C, 75.79; H, 6.88; N, 5.14.





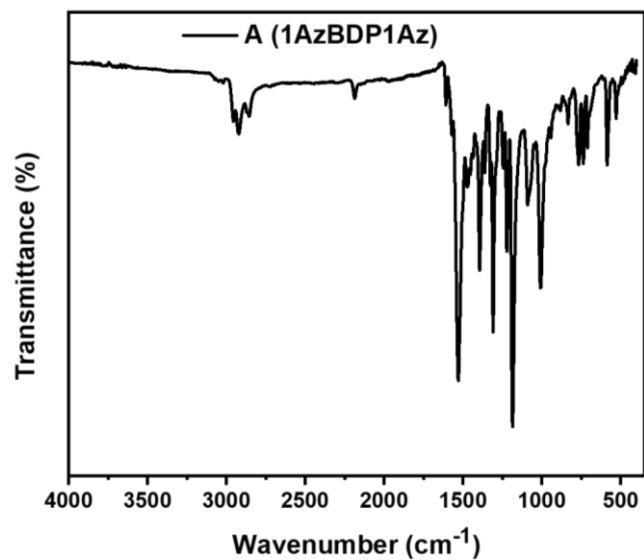

Figure S3: IR Spectra of A (1AzBDP1Az)

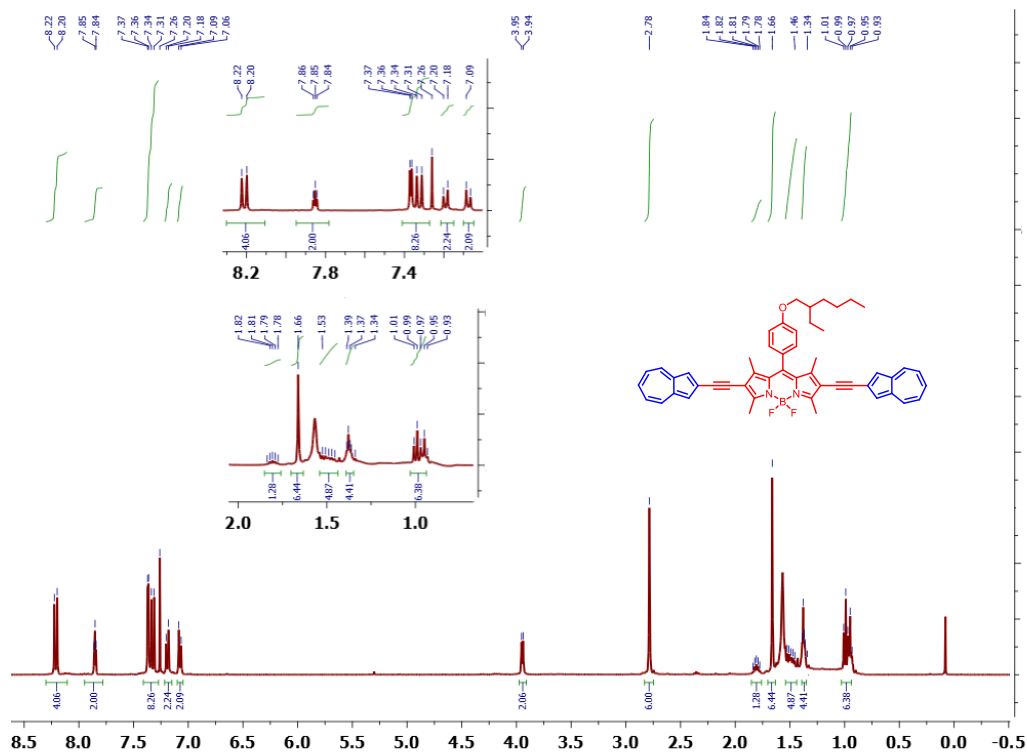

Figure S4: <sup>1</sup>H NMR Spectra of B (2AzBDP2Az)

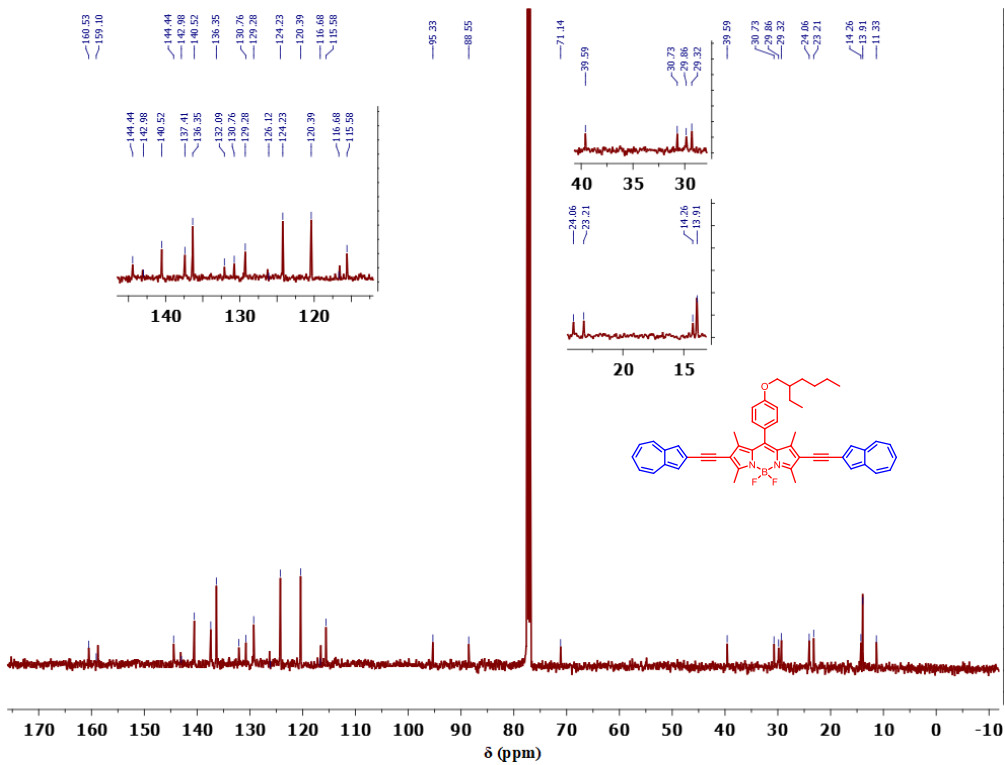

**Figure S5:**  $^{13}\text{C}$  NMR Spectra of **B** (2AzBDP2Az)

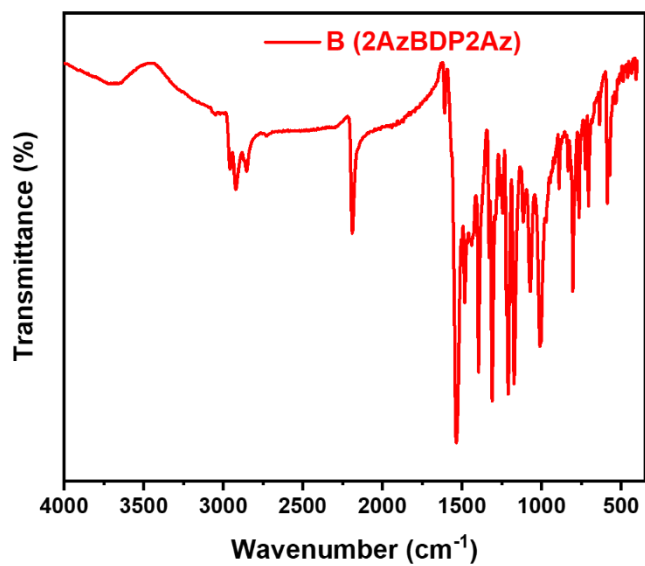

**Figure S6:** IR Spectra of **B** (2AzBDP2Az)

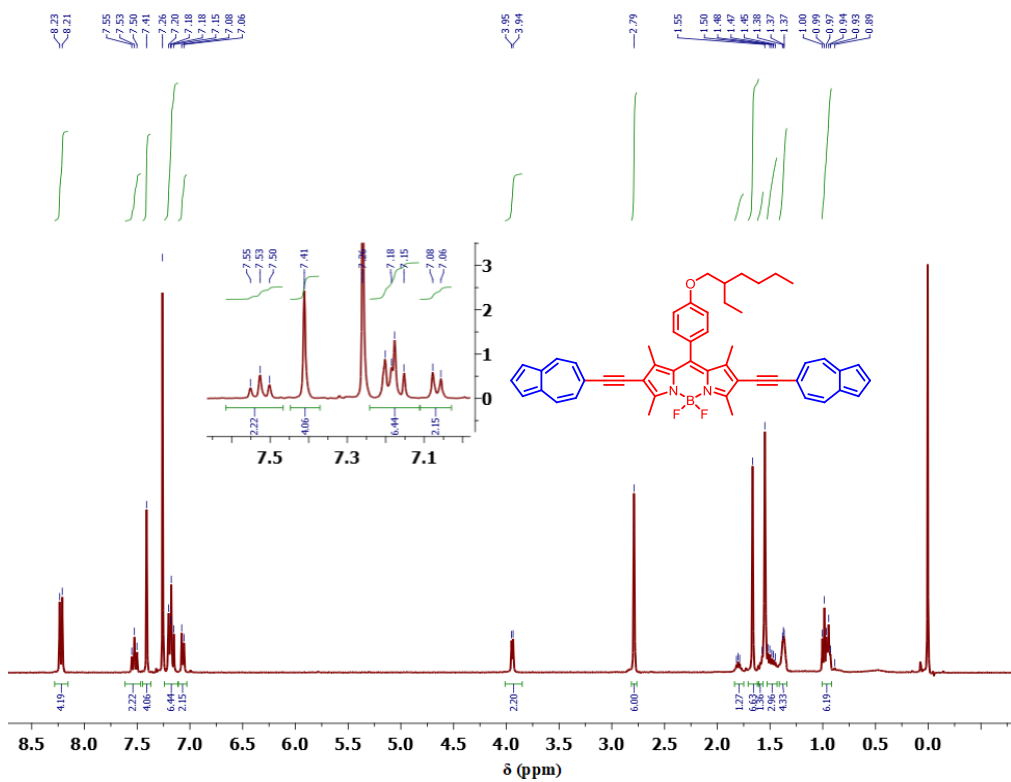

**Figure S7:  $^1\text{H}$  NMR Spectra of C (6AzBDP6Az)**

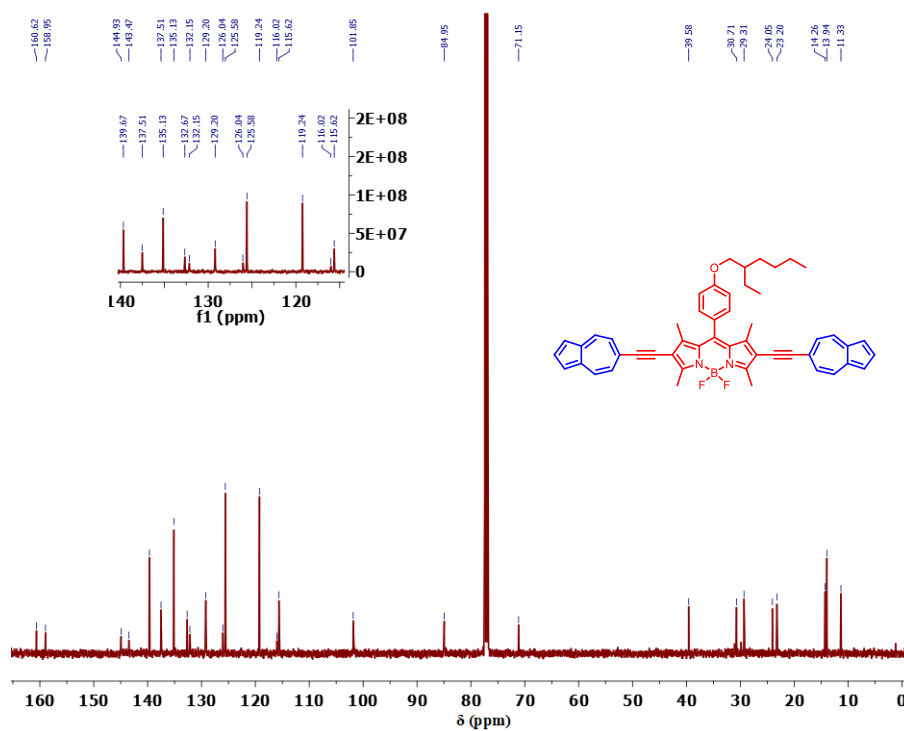

**Figure S8:  $^{13}\text{C}$  NMR Spectra of C (6AzBDP6Az)**

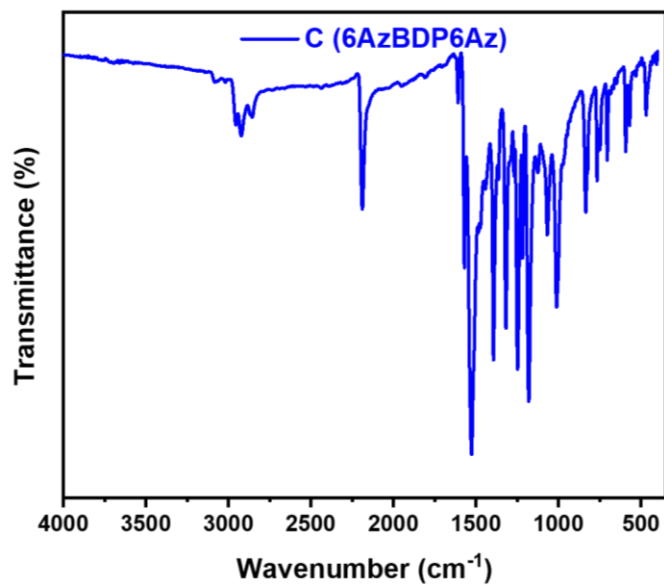

Figure S9: IR Spectra of C (6AzBDP6Az)

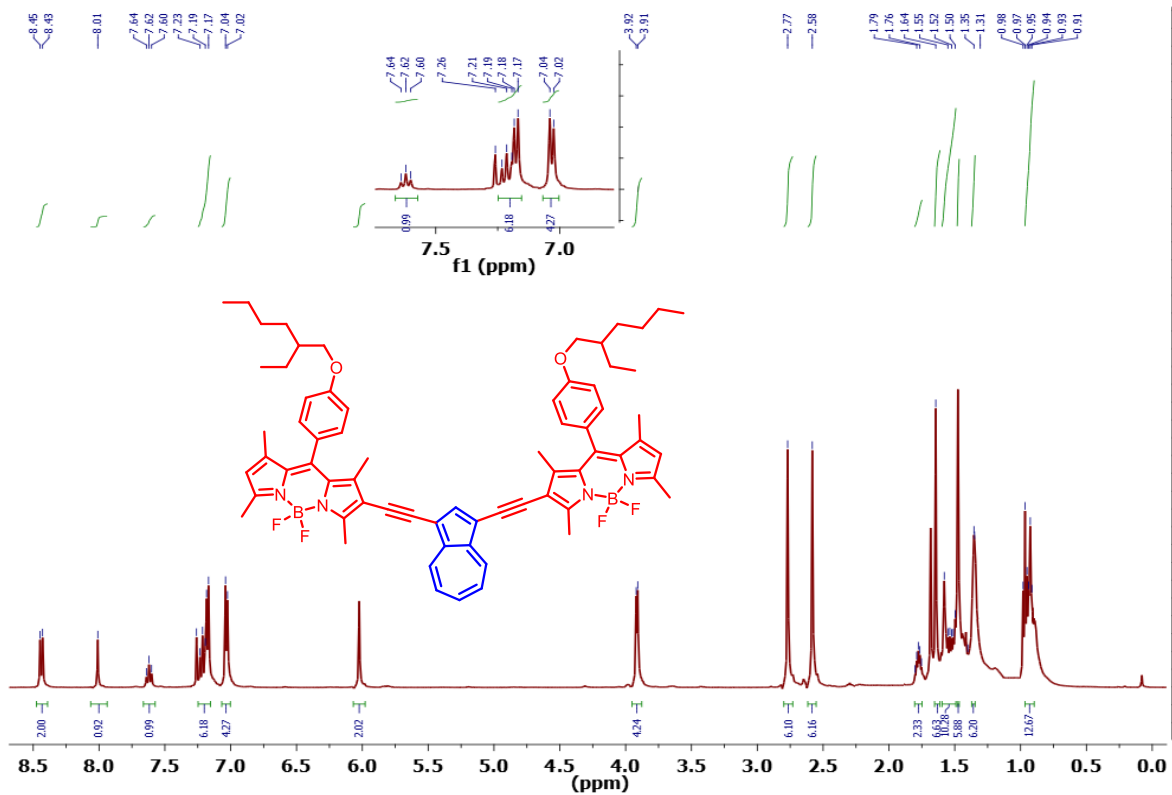

Figure S10: <sup>1</sup>H NMR Spectra of D (BDPAzBDP)

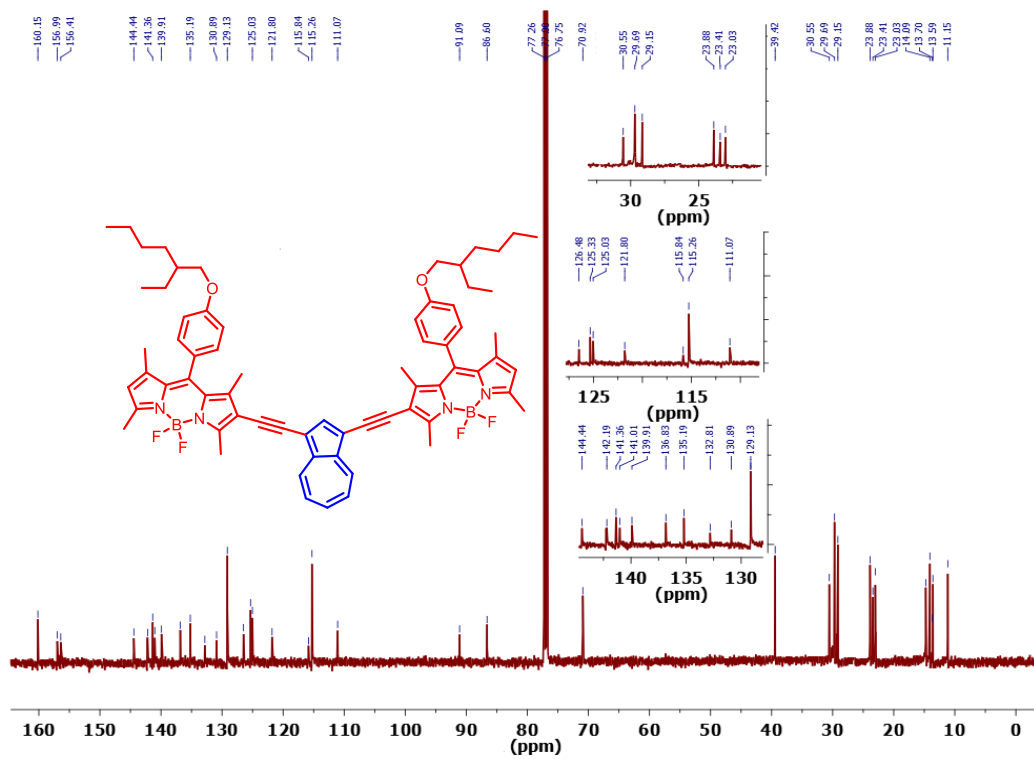

Figure S11:  $^{13}\text{C}$  NMR Spectra of D (BDPAzBDP)

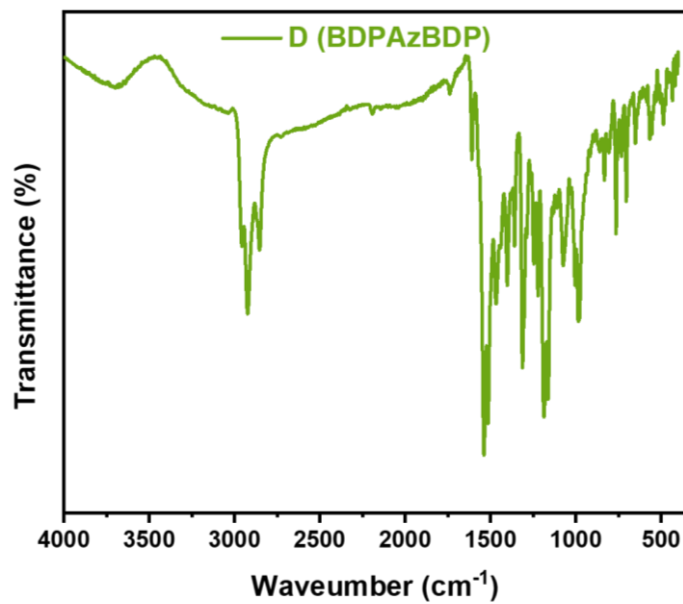

Figure S12: IR Spectra of D (BDPAzBDP)

**Table S1:** TD-DFT spectra of azulene-BODIPY triads

| Compound                                                                                                                        | TD-DFT spectra                                                                                                                                 |
|---------------------------------------------------------------------------------------------------------------------------------|------------------------------------------------------------------------------------------------------------------------------------------------|
| 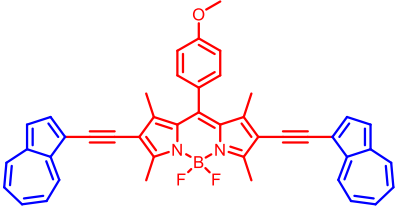 <p style="text-align: center;"><b>A</b></p>   | <p style="text-align: center;"><b>UV-VIS Spectrum</b></p>    |
|  <p style="text-align: center;"><b>B</b></p>   | <p style="text-align: center;"><b>UV-VIS Spectrum</b></p>   |
|  <p style="text-align: center;"><b>C</b></p> | <p style="text-align: center;"><b>UV-VIS Spectrum</b></p>  |
|  <p style="text-align: center;"><b>D</b></p> | <p style="text-align: center;"><b>UV-VIS Spectrum</b></p>  |

## References

- <sup>1</sup> M. J. Frisch, G. W. Trucks, H. B. Schlegel, G. E. Scuseria, M. A. Robb, J. R. Cheeseman, G. Scalmani, V. Barone, B. Mennucci, G. A. Petersson, H. Nakatsuji, M. Caricato, X. Li, H. P. Hratchian, A. F. Izmaylov, J. Bloino, G. Zheng, J. L. Sonnenberg, M. Hada, M. Ehara, K. Toyota, R. Fukuda, J. Hasegawa, M. Ishida, T. Nakajima, Y. Honda, O. Kitao, H. Nakai, T. Vreven, J. A. Montgomery, J. E. Peralta, F. Ogliaro, M. Bearpark, J. J. Heyd, E. Brothers, K. N. Kudin, V. N. Staroverov, R. Kobayashi, J. Normand, K. Raghavachari, A. Rendell, J. C. Burant, S. S. Iyengar, J. Tomasi, M. Cossi, N. Rega, J. M. Millam, M. Klene, J. E. Knox, J. B. Cross, V. Bakken, C. Adamo, J. Jaramillo, R. Gomperts, R. E. Stratmann, O. Yazyev, A. J. Austin, R. Cammi, C. Pomelli, J. W. Ochterski, R. L. Martin, K. Morokuma, V. G. Zakrzewski, G. A. Voth, P. Salvador, J. J. Dannenberg, S. Dapprich, A. D. Daniels, O. Farkas, J. B. Foresman, J. V. Ortiz, J. Cioslowski, D. J. Fox, Gaussian 09, Revision E.01, Gaussian, Inc.: Wallingford CT, 2009.
- <sup>2</sup> (a) J. Dubovik, A. Bredihhin, *Synthesis*, 2015, 47, 2663–2669. (b) R. N. McDonald, Richmond, J. R. Curtis, H. E. Petty, T. L. Hoskinsl, *J. Org. Chem.*, 1976, **41**, 1811-1821. (c) T. Nozoe, S. Matsumura, Y. Murase, S. Seto, *Bull. Chem. Soc. Jpn.*, 1962, **35**, 1179-1188.
- <sup>3</sup> (a) C. P. Sen, R. G. Shrestha, L. K. Shrestha, K. Ariga, S. Valiyaveetil, *Chem.Eur.J.*, 2015, **21**, 17344-17354. (b) C. Lambert, T. Scherpf, H. Ceymann, A. Schmiedel, M. Holzapfel, *J. Am. Chem. Soc.*, 2015, **137**, 3547-3557.

## Coordinates for optimised geometries

### A (1AzBDP1Az)

| Center<br>Number | Atomic<br>Number | Atomic<br>Type | Coordinates (Angstroms) |           |           |
|------------------|------------------|----------------|-------------------------|-----------|-----------|
|                  |                  |                | X                       | Y         | Z         |
| 1                | 6                | 0              | -0.081238               | 3.923605  | -0.791227 |
| 2                | 6                | 0              | -0.076964               | 2.528058  | -0.870636 |
| 3                | 6                | 0              | -0.003412               | 1.735076  | 0.277122  |
| 4                | 6                | 0              | 0.064476                | 2.372988  | 1.526680  |
| 5                | 6                | 0              | 0.057227                | 3.758609  | 1.621448  |
| 6                | 6                | 0              | -0.015187               | 4.545498  | 0.461358  |
| 7                | 8                | 0              | -0.014526               | 5.893688  | 0.660307  |
| 8                | 6                | 0              | -0.089906               | 6.742154  | -0.475506 |
| 9                | 6                | 0              | 0.000258                | 0.244000  | 0.175991  |
| 10               | 6                | 0              | 1.226882                | -0.441728 | 0.126486  |
| 11               | 7                | 0              | 1.250799                | -1.841515 | 0.028123  |
| 12               | 5                | 0              | 0.006153                | -2.777772 | -0.058195 |

|    |   |   |            |           |           |
|----|---|---|------------|-----------|-----------|
| 13 | 7 | 0 | -1.242150  | -1.845541 | 0.014606  |
| 14 | 6 | 0 | -1.223719  | -0.446700 | 0.126861  |
| 15 | 6 | 0 | -2.513175  | -2.267181 | -0.013615 |
| 16 | 6 | 0 | -3.381825  | -1.139465 | 0.084064  |
| 17 | 6 | 0 | -2.575770  | 0.009524  | 0.176041  |
| 18 | 6 | 0 | 2.577220   | 0.021803  | 0.151207  |
| 19 | 6 | 0 | 3.387839   | -1.124600 | 0.068540  |
| 20 | 6 | 0 | 2.523365   | -2.257545 | -0.006814 |
| 21 | 9 | 0 | 0.001114   | -3.662692 | 1.015210  |
| 22 | 9 | 0 | 0.014633   | -3.467282 | -1.266998 |
| 23 | 6 | 0 | -3.115199  | 1.401138  | 0.306458  |
| 24 | 6 | 0 | -2.896447  | -3.703751 | -0.127710 |
| 25 | 6 | 0 | 3.109286   | 1.419329  | 0.243243  |
| 26 | 6 | 0 | 2.912130   | -3.693259 | -0.112605 |
| 27 | 6 | 0 | -4.792372  | -1.207367 | 0.084361  |
| 28 | 6 | 0 | 4.798456   | -1.188609 | 0.055796  |
| 29 | 6 | 0 | -6.010316  | -1.289349 | 0.082335  |
| 30 | 6 | 0 | 6.016265   | -1.271918 | 0.043439  |
| 31 | 6 | 0 | -7.416238  | -1.394511 | 0.084364  |
| 32 | 6 | 0 | 7.421633   | -1.383296 | 0.033779  |
| 33 | 6 | 0 | -8.341301  | -0.332498 | -0.118435 |
| 34 | 6 | 0 | -9.705112  | -0.926974 | -0.021670 |
| 35 | 6 | 0 | -9.532597  | -2.303862 | 0.228014  |
| 36 | 6 | 0 | -8.167882  | -2.581735 | 0.291471  |
| 37 | 6 | 0 | 8.166901   | -2.583551 | 0.180535  |
| 38 | 6 | 0 | 9.532962   | -2.311321 | 0.123424  |
| 39 | 6 | 0 | 9.712970   | -0.925293 | -0.062164 |
| 40 | 6 | 0 | 8.352406   | -0.318446 | -0.122929 |
| 41 | 6 | 0 | -8.008394  | 0.993017  | -0.364776 |
| 42 | 6 | 0 | -8.854125  | 2.087968  | -0.572827 |
| 43 | 6 | 0 | -10.251862 | 2.121076  | -0.584248 |
| 44 | 6 | 0 | -11.172075 | 1.085624  | -0.397865 |
| 45 | 6 | 0 | -10.923843 | -0.268862 | -0.149670 |
| 46 | 6 | 0 | 10.935238  | -0.269614 | -0.166831 |
| 47 | 6 | 0 | 11.191060  | 1.093394  | -0.352949 |
| 48 | 6 | 0 | 10.276685  | 2.142405  | -0.483685 |
| 49 | 6 | 0 | 8.878888   | 2.117798  | -0.463761 |
| 50 | 6 | 0 | 8.027195   | 1.019575  | -0.302704 |
| 51 | 1 | 0 | -0.136013  | 4.506559  | -1.703439 |
| 52 | 1 | 0 | -0.129970  | 2.052404  | -1.846282 |
| 53 | 1 | 0 | 0.121335   | 1.773594  | 2.431293  |
| 54 | 1 | 0 | 0.107253   | 4.257405  | 2.584250  |
| 55 | 1 | 0 | -0.078151  | 7.762062  | -0.087463 |
| 56 | 1 | 0 | 0.769129   | 6.598371  | -1.143937 |
| 57 | 1 | 0 | -1.017591  | 6.579050  | -1.039549 |
| 58 | 1 | 0 | -4.201758  | 1.357948  | 0.425967  |
| 59 | 1 | 0 | -2.695917  | 1.928271  | 1.169033  |
| 60 | 1 | 0 | -2.894519  | 2.014244  | -0.574949 |
| 61 | 1 | 0 | -2.462806  | -4.143697 | -1.031848 |
| 62 | 1 | 0 | -2.501744  | -4.272922 | 0.720786  |
| 63 | 1 | 0 | -3.983653  | -3.801128 | -0.158294 |
| 64 | 1 | 0 | 2.806806   | 1.916503  | 1.170994  |
| 65 | 1 | 0 | 4.202417   | 1.393185  | 0.213551  |
| 66 | 1 | 0 | 2.757988   | 2.050405  | -0.580179 |



|    |   |   |            |           |           |
|----|---|---|------------|-----------|-----------|
| 67 | 1 | 0 | 3.999917   | -3.788061 | -0.123105 |
| 68 | 1 | 0 | 2.502063   | -4.263211 | 0.727818  |
| 69 | 1 | 0 | 2.497371   | -4.134239 | -1.025271 |
| 70 | 1 | 0 | -10.337003 | -3.019200 | 0.350901  |
| 71 | 1 | 0 | -7.725994  | -3.554823 | 0.473111  |
| 72 | 1 | 0 | 7.719766   | -3.561509 | 0.317778  |
| 73 | 1 | 0 | 10.333378  | -3.036633 | 0.207894  |
| 74 | 1 | 0 | -6.939655  | 1.200510  | -0.401539 |
| 75 | 1 | 0 | -8.357508  | 3.039437  | -0.748763 |
| 76 | 1 | 0 | -10.689891 | 3.101188  | -0.767089 |
| 77 | 1 | 0 | -12.220525 | 1.369183  | -0.454968 |
| 78 | 1 | 0 | -11.806247 | -0.899199 | -0.041249 |
| 79 | 1 | 0 | 11.814033  | -0.910008 | -0.093760 |
| 80 | 1 | 0 | 12.241017  | 1.372530  | -0.403804 |
| 81 | 1 | 0 | 10.720079  | 3.127252  | -0.622953 |
| 82 | 1 | 0 | 8.387486   | 3.079765  | -0.590264 |
| 83 | 1 | 0 | 6.959778   | 1.236044  | -0.321486 |

## B (2AZBDP2AZ)

| Center<br>Number | Atomic<br>Number | Atomic<br>Type | Coordinates (Angstroms) |           |           |
|------------------|------------------|----------------|-------------------------|-----------|-----------|
|                  |                  |                | X                       | Y         | Z         |
| 1                | 6                | 0              | -0.000879               | 4.435385  | -1.057471 |
| 2                | 6                | 0              | -0.000698               | 3.038042  | -1.087900 |
| 3                | 6                | 0              | -0.000357               | 2.286247  | 0.089734  |
| 4                | 6                | 0              | -0.000221               | 2.966879  | 1.318324  |
| 5                | 6                | 0              | -0.000463               | 4.354961  | 1.363625  |
| 6                | 6                | 0              | -0.000773               | 5.100836  | 0.174483  |
| 7                | 8                | 0              | -0.000939               | 6.454311  | 0.325877  |
| 8                | 6                | 0              | -0.001369               | 7.263688  | -0.841257 |
| 9                | 6                | 0              | -0.000112               | 0.792722  | 0.041182  |
| 10               | 6                | 0              | 1.224722                | 0.102691  | 0.017913  |
| 11               | 7                | 0              | 1.246769                | -1.300839 | -0.036377 |
| 12               | 5                | 0              | 0.000406                | -2.238512 | -0.084477 |
| 13               | 7                | 0              | -1.246282               | -1.301205 | -0.038061 |
| 14               | 6                | 0              | -1.224704               | 0.102334  | 0.016259  |
| 15               | 6                | 0              | -2.516917               | -1.720999 | -0.051684 |
| 16               | 6                | 0              | -3.382554               | -0.586946 | -0.004763 |
| 17               | 6                | 0              | -2.574791               | 0.564500  | 0.037658  |
| 18               | 6                | 0              | 2.574659                | 0.565255  | 0.040731  |
| 19               | 6                | 0              | 3.382795                | -0.585958 | -0.000785 |
| 20               | 6                | 0              | 2.517542                | -1.720262 | -0.048602 |
| 21               | 9                | 0              | -0.000192               | -3.083759 | 1.019609  |
| 22               | 9                | 0              | 0.001284                | -2.968384 | -1.268228 |
| 23               | 6                | 0              | -3.112875               | 1.961162  | 0.095040  |
| 24               | 6                | 0              | -2.904545               | -3.159521 | -0.108153 |
| 25               | 6                | 0              | 3.112273                | 1.962077  | 0.098573  |
| 26               | 6                | 0              | 2.905651                | -3.158677 | -0.104590 |
| 27               | 6                | 0              | -4.791336               | -0.646716 | -0.001622 |

|    |   |   |            |           |           |
|----|---|---|------------|-----------|-----------|
| 28 | 6 | 0 | 4.791604   | -0.645318 | 0.003750  |
| 29 | 6 | 0 | -6.009862  | -0.708928 | 0.001987  |
| 30 | 6 | 0 | 6.010151   | -0.707056 | 0.007790  |
| 31 | 6 | 0 | -7.418390  | -0.790998 | 0.009329  |
| 32 | 6 | 0 | 7.418668   | -0.789666 | 0.013083  |
| 33 | 6 | 0 | -8.171469  | -1.992107 | -0.040938 |
| 34 | 6 | 0 | -9.532088  | -1.671196 | -0.013606 |
| 35 | 6 | 0 | -9.624003  | -0.177188 | 0.057743  |
| 36 | 6 | 0 | -8.312428  | 0.308696  | 0.068931  |
| 37 | 6 | 0 | 8.171187   | -1.991135 | -0.036977 |
| 38 | 6 | 0 | 9.531974   | -1.670730 | -0.012286 |
| 39 | 6 | 0 | 9.624609   | -0.176677 | 0.057197  |
| 40 | 6 | 0 | 8.313244   | 0.309743  | 0.069971  |
| 41 | 6 | 0 | -10.587649 | -2.584024 | -0.046599 |
| 42 | 6 | 0 | -11.961898 | -2.340069 | -0.021663 |
| 43 | 6 | 0 | -12.633425 | -1.114507 | 0.042587  |
| 44 | 6 | 0 | -12.117970 | 0.184705  | 0.098459  |
| 45 | 6 | 0 | -10.784132 | 0.597542  | 0.104979  |
| 46 | 6 | 0 | 10.587109  | -2.584027 | -0.045946 |
| 47 | 6 | 0 | 11.961495  | -2.340597 | -0.023587 |
| 48 | 6 | 0 | 12.633627  | -1.115223 | 0.038058  |
| 49 | 6 | 0 | 12.118786  | 0.184270  | 0.093257  |
| 50 | 6 | 0 | 10.785123  | 0.597646  | 0.101568  |
| 51 | 1 | 0 | -0.001110  | 4.986387  | -1.990874 |
| 52 | 1 | 0 | -0.000800  | 2.528918  | -2.047993 |
| 53 | 1 | 0 | 0.000062   | 2.400141  | 2.245505  |
| 54 | 1 | 0 | -0.000401  | 4.887250  | 2.309600  |
| 55 | 1 | 0 | -0.001500  | 8.296132  | -0.488004 |
| 56 | 1 | 0 | 0.893663   | 7.089121  | -1.452443 |
| 57 | 1 | 0 | -0.896606  | 7.088748  | -1.452038 |
| 58 | 1 | 0 | -4.205957  | 1.928662  | 0.099651  |
| 59 | 1 | 0 | -2.781128  | 2.493072  | 0.992946  |
| 60 | 1 | 0 | -2.790476  | 2.561654  | -0.762205 |
| 61 | 1 | 0 | -3.992201  | -3.255502 | -0.114007 |
| 62 | 1 | 0 | -2.489682  | -3.630857 | -1.005429 |
| 63 | 1 | 0 | -2.493167  | -3.699401 | 0.751221  |
| 64 | 1 | 0 | 2.780695   | 2.493433  | 0.996875  |
| 65 | 1 | 0 | 4.205367   | 1.929962  | 0.102808  |
| 66 | 1 | 0 | 2.789329   | 2.562876  | -0.758245 |
| 67 | 1 | 0 | 2.493873   | -3.698527 | 0.754625  |
| 68 | 1 | 0 | 2.491501   | -3.630300 | -1.002033 |
| 69 | 1 | 0 | 3.993339   | -3.254328 | -0.109675 |
| 70 | 1 | 0 | -7.754471  | -2.990115 | -0.091456 |
| 71 | 1 | 0 | -8.020683  | 1.350422  | 0.116110  |
| 72 | 1 | 0 | 7.753710   | -2.989039 | -0.085633 |
| 73 | 1 | 0 | 8.021979   | 1.351642  | 0.116373  |
| 74 | 1 | 0 | -10.293728 | -3.632119 | -0.098624 |
| 75 | 1 | 0 | -12.596530 | -3.222918 | -0.056948 |
| 76 | 1 | 0 | -13.720152 | -1.182011 | 0.050117  |
| 77 | 1 | 0 | -12.856556 | 0.982187  | 0.142999  |
| 78 | 1 | 0 | -10.622219 | 1.674123  | 0.154079  |
| 79 | 1 | 0 | 10.292676  | -3.632064 | -0.096243 |
| 80 | 1 | 0 | 12.595722  | -3.223738 | -0.058863 |
| 81 | 1 | 0 | 13.720338  | -1.183155 | 0.043833  |

|    |   |   |           |          |          |
|----|---|---|-----------|----------|----------|
| 82 | 1 | 0 | 12.857774 | 0.981502 | 0.135591 |
| 83 | 1 | 0 | 10.623715 | 1.674349 | 0.149677 |

---

### C (6AZBDP6AZ)

| Center<br>Number | Atomic<br>Number | Atomic<br>Type | Coordinates (Angstroms) |           |           |
|------------------|------------------|----------------|-------------------------|-----------|-----------|
|                  |                  |                | X                       | Y         | Z         |
| 1                | 6                | 0              | 0.000551                | 4.426784  | -1.056276 |
| 2                | 6                | 0              | 0.000555                | 3.029462  | -1.085189 |
| 3                | 6                | 0              | -0.000012               | 2.279271  | 0.093559  |
| 4                | 6                | 0              | -0.000560               | 2.961093  | 1.321599  |
| 5                | 6                | 0              | -0.000527               | 4.349144  | 1.365148  |
| 6                | 6                | 0              | 0.000019                | 5.093849  | 0.175011  |
| 7                | 8                | 0              | -0.000028               | 6.446675  | 0.324936  |
| 8                | 6                | 0              | 0.000606                | 7.256023  | -0.842769 |
| 9                | 6                | 0              | -0.000019               | 0.785825  | 0.046995  |
| 10               | 6                | 0              | 1.224458                | 0.095009  | 0.023794  |
| 11               | 7                | 0              | 1.246560                | -1.308591 | -0.028437 |
| 12               | 5                | 0              | -0.000021               | -2.246868 | -0.073745 |
| 13               | 7                | 0              | -1.246597               | -1.308600 | -0.028173 |
| 14               | 6                | 0              | -1.224498               | 0.095004  | 0.023949  |
| 15               | 6                | 0              | -2.516766               | -1.728584 | -0.040861 |
| 16               | 6                | 0              | -3.381841               | -0.593905 | 0.004447  |
| 17               | 6                | 0              | -2.574215               | 0.557838  | 0.044982  |
| 18               | 6                | 0              | 2.574175                | 0.557842  | 0.044905  |
| 19               | 6                | 0              | 3.381803                | -0.593893 | 0.004239  |
| 20               | 6                | 0              | 2.516729                | -1.728572 | -0.041169 |
| 21               | 6                | 0              | -4.790892               | -0.652809 | 0.007272  |
| 22               | 6                | 0              | 4.790854                | -0.652801 | 0.007102  |
| 23               | 9                | 0              | 0.000107                | -3.088818 | 1.032102  |
| 24               | 9                | 0              | -0.000149               | -2.977874 | -1.256082 |
| 25               | 6                | 0              | -6.008901               | -0.713363 | 0.009468  |
| 26               | 6                | 0              | 6.008863                | -0.713362 | 0.009349  |
| 27               | 6                | 0              | 3.110151                | 1.955224  | 0.100384  |
| 28               | 6                | 0              | 2.902798                | -3.167586 | -0.095345 |
| 29               | 6                | 0              | -3.110195               | 1.955227  | 0.100209  |
| 30               | 6                | 0              | -2.902834               | -3.167602 | -0.094960 |
| 31               | 6                | 0              | -7.431693               | -0.795830 | 0.012138  |
| 32               | 6                | 0              | 7.431653                | -0.795852 | 0.012084  |
| 33               | 6                | 0              | -7.979063               | -2.099397 | -0.047359 |
| 34               | 6                | 0              | -9.312913               | -2.497336 | -0.060136 |
| 35               | 6                | 0              | -10.474174              | -1.727053 | -0.018198 |
| 36               | 6                | 0              | -10.563645              | -0.236242 | 0.053854  |
| 37               | 6                | 0              | -9.502769               | 0.667647  | 0.092042  |
| 38               | 6                | 0              | -8.130797               | 0.432899  | 0.074059  |
| 39               | 6                | 0              | 8.130780                | 0.432885  | 0.073576  |
| 40               | 6                | 0              | 9.502756                | 0.667613  | 0.091519  |
| 41               | 6                | 0              | 10.563616               | -0.236309 | 0.053680  |
| 42               | 6                | 0              | 10.474116               | -1.727144 | -0.017843 |

|    |   |   |            |           |           |
|----|---|---|------------|-----------|-----------|
| 43 | 6 | 0 | 9.312841   | -2.497420 | -0.059538 |
| 44 | 6 | 0 | 7.978999   | -2.099451 | -0.046926 |
| 45 | 6 | 0 | -11.793191 | -2.209148 | -0.035422 |
| 46 | 6 | 0 | -12.668314 | -1.110898 | 0.021348  |
| 47 | 6 | 0 | -11.930865 | 0.084282  | 0.075526  |
| 48 | 6 | 0 | 11.930843  | 0.084193  | 0.075278  |
| 49 | 6 | 0 | 12.668267  | -1.111021 | 0.021547  |
| 50 | 6 | 0 | 11.793123  | -2.209274 | -0.034857 |
| 51 | 1 | 0 | 0.000962   | 4.976752  | -1.990257 |
| 52 | 1 | 0 | 0.000981   | 2.519419  | -2.044828 |
| 53 | 1 | 0 | -0.000995  | 2.395619  | 2.249579  |
| 54 | 1 | 0 | -0.000926  | 4.882548  | 2.310465  |
| 55 | 1 | 0 | 0.896124   | 7.080886  | -1.452927 |
| 56 | 1 | 0 | -0.894362  | 7.081051  | -1.453784 |
| 57 | 1 | 0 | 2.777098   | 2.487547  | 0.997439  |
| 58 | 1 | 0 | 4.203251   | 1.925688  | 0.105247  |
| 59 | 1 | 0 | 2.786586   | 2.553646  | -0.757732 |
| 60 | 1 | 0 | 3.990170   | -3.266177 | -0.100707 |
| 61 | 1 | 0 | 2.490482   | -3.705524 | 0.764738  |
| 62 | 1 | 0 | 2.487711   | -3.639635 | -0.992078 |
| 63 | 1 | 0 | -4.203301  | 1.925737  | 0.103873  |
| 64 | 1 | 0 | -2.778138  | 2.487293  | 0.997794  |
| 65 | 1 | 0 | -2.785629  | 2.553867  | -0.757368 |
| 66 | 1 | 0 | -2.487995  | -3.639625 | -0.991823 |
| 67 | 1 | 0 | -2.490273  | -3.705556 | 0.764993  |
| 68 | 1 | 0 | -3.990207  | -3.266203 | -0.100029 |
| 69 | 1 | 0 | -7.246623  | -2.900643 | -0.088834 |
| 70 | 1 | 0 | -9.472384  | -3.574335 | -0.110733 |
| 71 | 1 | 0 | -9.790394  | 1.717731  | 0.143788  |
| 72 | 1 | 0 | -7.499266  | 1.316027  | 0.113563  |
| 73 | 1 | 0 | 7.499266   | 1.316041  | 0.112732  |
| 74 | 1 | 0 | 9.790399   | 1.717711  | 0.142898  |
| 75 | 1 | 0 | 9.472294   | -3.574439 | -0.109746 |
| 76 | 1 | 0 | 7.246544   | -2.900698 | -0.088114 |
| 77 | 1 | 0 | -12.076814 | -3.253912 | -0.084294 |
| 78 | 1 | 0 | -13.751338 | -1.176019 | 0.023168  |
| 79 | 1 | 0 | -12.337508 | 1.087547  | 0.125516  |
| 80 | 1 | 0 | 12.337506  | 1.087467  | 0.124924  |
| 81 | 1 | 0 | 13.751290  | -1.176165 | 0.023423  |
| 82 | 1 | 0 | 12.076724  | -3.254061 | -0.083348 |
| 83 | 1 | 0 | 0.000530   | 8.288369  | -0.489523 |

## D (BDPAZBDP)

| Center<br>Number | Atomic<br>Number | Atomic<br>Type | Coordinates (Angstroms) |          |          |
|------------------|------------------|----------------|-------------------------|----------|----------|
|                  |                  |                | X                       | Y        | Z        |
| 1                | 6                | 0              | -9.965027               | 2.403532 | 1.999212 |
| 2                | 6                | 0              | -9.413634               | 1.167356 | 1.650254 |
| 3                | 6                | 0              | -9.187854               | 0.823269 | 0.315078 |

|    |   |   |            |           |           |
|----|---|---|------------|-----------|-----------|
| 4  | 6 | 0 | -9.529575  | 1.752168  | -0.681315 |
| 5  | 6 | 0 | -10.080363 | 2.983393  | -0.349800 |
| 6  | 6 | 0 | -10.302187 | 3.318952  | 0.994849  |
| 7  | 8 | 0 | -10.845645 | 4.548975  | 1.214847  |
| 8  | 6 | 0 | -11.096665 | 4.945611  | 2.554887  |
| 9  | 6 | 0 | -8.599372  | -0.502389 | -0.044496 |
| 10 | 6 | 0 | -9.447175  | -1.605798 | -0.232713 |
| 11 | 7 | 0 | -8.919585  | -2.858891 | -0.568113 |
| 12 | 5 | 0 | -7.413551  | -3.194677 | -0.767973 |
| 13 | 7 | 0 | -6.636747  | -1.861074 | -0.528437 |
| 14 | 6 | 0 | -7.205100  | -0.623701 | -0.189921 |
| 15 | 6 | 0 | -5.306481  | -1.726629 | -0.605833 |
| 16 | 6 | 0 | -4.956619  | -0.374539 | -0.314202 |
| 17 | 6 | 0 | -6.148163  | 0.324817  | -0.049943 |
| 18 | 6 | 0 | -10.875430 | -1.739094 | -0.155404 |
| 19 | 6 | 0 | -11.150908 | -3.069621 | -0.446267 |
| 20 | 6 | 0 | -9.933419  | -3.735937 | -0.696188 |
| 21 | 9 | 0 | -7.190941  | -3.644538 | -2.066287 |
| 22 | 9 | 0 | -7.008890  | -4.150520 | 0.160084  |
| 23 | 6 | 0 | -6.205463  | 1.779405  | 0.305044  |
| 24 | 6 | 0 | -4.388935  | -2.850906 | -0.949608 |
| 25 | 6 | 0 | -11.916441 | -0.706114 | 0.162302  |
| 26 | 6 | 0 | -9.719941  | -5.171211 | -1.051582 |
| 27 | 6 | 0 | -3.637520  | 0.130590  | -0.300820 |
| 28 | 6 | 0 | -2.488981  | 0.542562  | -0.292177 |
| 29 | 6 | 0 | -1.155592  | 1.003973  | -0.275715 |
| 30 | 6 | 0 | -0.733943  | 2.362866  | -0.378353 |
| 31 | 6 | 0 | 0.746984   | 2.364133  | -0.307041 |
| 32 | 6 | 0 | 1.159527   | 1.005206  | -0.172032 |
| 33 | 6 | 0 | -0.000927  | 0.204137  | -0.154382 |
| 34 | 6 | 0 | -1.577483  | 3.455231  | -0.525286 |
| 35 | 6 | 0 | -1.248839  | 4.812045  | -0.632063 |
| 36 | 6 | 0 | 0.016370   | 5.405970  | -0.613314 |
| 37 | 6 | 0 | 1.277773   | 4.816299  | -0.489345 |
| 38 | 6 | 0 | 1.597432   | 3.459921  | -0.355303 |
| 39 | 6 | 0 | 2.488578   | 0.542823  | -0.071750 |
| 40 | 6 | 0 | 3.632287   | 0.126083  | 0.014193  |
| 41 | 6 | 0 | 10.126325  | 2.907380  | 0.477520  |
| 42 | 6 | 0 | 9.537238   | 1.675972  | 0.778997  |
| 43 | 6 | 0 | 9.220456   | 0.757314  | -0.224648 |
| 44 | 6 | 0 | 9.507645   | 1.097628  | -1.556788 |
| 45 | 6 | 0 | 10.092332  | 2.317483  | -1.871496 |
| 46 | 6 | 0 | 10.407203  | 3.232724  | -0.854857 |
| 47 | 8 | 0 | 10.978813  | 4.399342  | -1.266156 |
| 48 | 6 | 0 | 11.323476  | 5.364563  | -0.283621 |
| 49 | 6 | 0 | 8.593920   | -0.557953 | 0.108316  |
| 50 | 6 | 0 | 7.191653   | -0.663559 | 0.155620  |
| 51 | 7 | 0 | 6.587545   | -1.891802 | 0.463513  |
| 52 | 5 | 0 | 7.330840   | -3.229355 | 0.776025  |
| 53 | 7 | 0 | 8.850612   | -2.912018 | 0.676428  |
| 54 | 6 | 0 | 9.414279   | -1.668517 | 0.364759  |
| 55 | 6 | 0 | 9.843038   | -3.799794 | 0.878053  |
| 56 | 6 | 0 | 11.082242  | -3.150441 | 0.701398  |
| 57 | 6 | 0 | 10.842662  | -1.819703 | 0.380781  |

|     |   |   |            |           |           |
|-----|---|---|------------|-----------|-----------|
| 58  | 6 | 0 | 6.157400   | 0.295046  | -0.064073 |
| 59  | 6 | 0 | 4.942621   | -0.389887 | 0.120722  |
| 60  | 6 | 0 | 5.256880   | -1.743384 | 0.445957  |
| 61  | 9 | 0 | 6.980201   | -4.194825 | -0.163458 |
| 62  | 9 | 0 | 7.012568   | -3.656561 | 2.062733  |
| 63  | 6 | 0 | 11.914851  | -0.802953 | 0.119406  |
| 64  | 6 | 0 | 9.588283   | -5.229239 | 1.229317  |
| 65  | 6 | 0 | 6.256749   | 1.746986  | -0.420095 |
| 66  | 6 | 0 | 4.306331   | -2.856745 | 0.730082  |
| 67  | 1 | 0 | -10.124675 | 2.636808  | 3.045670  |
| 68  | 1 | 0 | -9.155417  | 0.461413  | 2.435125  |
| 69  | 1 | 0 | -9.362212  | 1.502931  | -1.725679 |
| 70  | 1 | 0 | -10.348367 | 3.704928  | -1.115221 |
| 71  | 1 | 0 | -11.525734 | 5.947169  | 2.494086  |
| 72  | 1 | 0 | -11.812220 | 4.273836  | 3.046883  |
| 73  | 1 | 0 | -10.171412 | 4.982619  | 3.144686  |
| 74  | 1 | 0 | -12.130802 | -3.528833 | -0.480606 |
| 75  | 1 | 0 | -5.188056  | 2.171212  | 0.395199  |
| 76  | 1 | 0 | -6.732073  | 2.368724  | -0.454115 |
| 77  | 1 | 0 | -6.724214  | 1.953845  | 1.253069  |
| 78  | 1 | 0 | -4.521361  | -3.679584 | -0.246389 |
| 79  | 1 | 0 | -4.621142  | -3.242368 | -1.945871 |
| 80  | 1 | 0 | -3.351453  | -2.511070 | -0.925763 |
| 81  | 1 | 0 | -11.881061 | 0.143491  | -0.527608 |
| 82  | 1 | 0 | -12.912622 | -1.154958 | 0.096612  |
| 83  | 1 | 0 | -11.796999 | -0.294709 | 1.170423  |
| 84  | 1 | 0 | -10.675353 | -5.699784 | -1.099680 |
| 85  | 1 | 0 | -9.211280  | -5.256583 | -2.017733 |
| 86  | 1 | 0 | -9.074917  | -5.659040 | -0.312919 |
| 87  | 1 | 0 | -0.004679  | -0.874969 | -0.059944 |
| 88  | 1 | 0 | -2.638979  | 3.214574  | -0.564570 |
| 89  | 1 | 0 | -2.089860  | 5.492433  | -0.743366 |
| 90  | 1 | 0 | 0.020023   | 6.490635  | -0.710133 |
| 91  | 1 | 0 | 2.123372   | 5.500016  | -0.501223 |
| 92  | 1 | 0 | 2.657620   | 3.223170  | -0.277064 |
| 93  | 1 | 0 | 10.358458  | 3.595198  | 1.282454  |
| 94  | 1 | 0 | 9.322918   | 1.430652  | 1.815810  |
| 95  | 1 | 0 | 9.268319   | 0.396443  | -2.351700 |
| 96  | 1 | 0 | 10.316298  | 2.586272  | -2.899058 |
| 97  | 1 | 0 | 11.761193  | 6.202288  | -0.829091 |
| 98  | 1 | 0 | 10.439909  | 5.712558  | 0.267399  |
| 99  | 1 | 0 | 12.060699  | 4.970107  | 0.427921  |
| 100 | 1 | 0 | 12.052043  | -3.621231 | 0.801949  |
| 101 | 1 | 0 | 12.898933  | -1.271992 | 0.218034  |
| 102 | 1 | 0 | 11.843569  | -0.374304 | -0.885821 |
| 103 | 1 | 0 | 11.868179  | 0.036802  | 0.820936  |
| 104 | 1 | 0 | 8.996384   | -5.299403 | 2.148027  |
| 105 | 1 | 0 | 9.006500   | -5.721600 | 0.442550  |
| 106 | 1 | 0 | 10.531549  | -5.764074 | 1.366251  |
| 107 | 1 | 0 | 6.818260   | 1.908827  | -1.345846 |
| 108 | 1 | 0 | 5.251627   | 2.157194  | -0.554412 |
| 109 | 1 | 0 | 6.761515   | 2.328555  | 0.359345  |
| 110 | 1 | 0 | 3.276633   | -2.499416 | 0.664129  |
| 111 | 1 | 0 | 4.456224   | -3.676635 | 0.019726  |

112

1

0

4.488645

-3.267958

1.728452

---
